1  
2  
3  
4  
5  
6  
7  
8  
9  
10  
11  
12  
13  
14  
15  
16  
17  
18  
19  
20  
21  
22  
23  
24  
25  
26  
27  
28  
29

## Reorganization of the Mitochondria-Organelle Interactome during Postnatal Development in Skeletal Muscle

<sup>1,3</sup>Yuho Kim, <sup>1</sup>Eric Lindberg, <sup>1</sup>Christopher K. E. Bleck, and <sup>1,2</sup>Brian Glancy

<sup>1</sup>National Heart, Lung, and Blood Institute National Institutes of Health, Bethesda, MD  
20892, USA

<sup>2</sup>National Institute of Arthritis and Musculoskeletal and Skin Diseases, National  
Institutes of Health, Bethesda, MD 20892, USA

<sup>3</sup>Department of Physical Therapy and Kinesiology, University of Massachusetts Lowell,  
MA 01854, USA

**\*Corresponding Author:**

Brian Glancy, PhD  
Muscle Energetics Laboratory  
NHLBI/NIAMS/NIH  
10 Center Dr., Room B1D416  
Bethesda, MD, 20892, USA  
Tel: +1-301-496-2679  
Fax: +1-301-402-2389  
Email: [brian.glancy@nih.gov](mailto:brian.glancy@nih.gov)

30 **Abstract**

31 Cellular development requires the integrated assembly of intracellular structures into  
32 functionally specialized regions supporting overall cellular performance. However, it  
33 remains unclear how coordination of organelle interactions contributes to development of  
34 functional specificity across cell types. Here, we utilize a subcellular connectomics  
35 approach to define the cell-scale reorganization of the mitochondria-organelle  
36 interactome across postnatal development in skeletal muscle. We show that while  
37 mitochondrial networks are disorganized and loosely associated with the contractile  
38 apparatus at birth, contact sites among mitochondria, lipid droplets, and the sarcoplasmic  
39 reticulum are highly abundant in neonatal muscles. The maturation process is  
40 characterized by a transition to highly organized mitochondrial networks wrapped tightly  
41 around the muscle sarcomere but also to less frequent interactions with both lipid droplets  
42 and the sarcoplasmic reticulum. These data demonstrate a developmental redesign  
43 reflecting a functional shift from muscle cell assembly supported by inter-organelle  
44 communication toward a muscle fiber highly specialized for contractile function.

45

46

47

48

49

50 **Keywords**

51 Postnatal muscle development, 3D mitochondrial structure, volume electron  
52 microscopy, organelle interactions, cellular assembly

## 53 **Introduction**

54 Cellular assembly necessitates the physical coordination of many different  
55 organelles in order to optimize intracellular structure to meet the functional requirements  
56 of the cell<sup>1,2</sup>. Thus, with the extensive array of functional demands observed across cell  
57 types within the body, the internal structure within different cells can also vary widely<sup>3,4</sup>.  
58 While the functional consequences of altering the content of different organelle types  
59 within a cell is well appreciated<sup>4</sup>, and the significance of varying organelle protein and  
60 lipid composition is increasingly recognized<sup>5,6</sup>, the impact of organelle organization on  
61 overall cellular function is less well understood<sup>7</sup>. Organelles within a cell do not operate  
62 in isolation, but rather they rely on inputs from and/or interactions with other cellular  
63 components in order to perform tasks in support of the cell<sup>1,7</sup>. As such, the spatial  
64 proximity among different organelles determines how quickly or how often interactions  
65 can occur, both of which are critical regulators of the functional capacity for a given  
66 process within a cell. Thus, a better understanding of how organelle interactions are  
67 altered in response to changing functional demands would provide key insight into how  
68 intracellular organization contributes to cellular function. Additionally, while the impact of  
69 organelle interactions in cell culture<sup>8,9</sup>, adult tissues<sup>5,10</sup>, and pathological conditions<sup>11,12</sup>  
70 has been of great interest in recent years, there is little information available on the role  
71 of interorganelle connectivity during cellular assembly or development when  
72 communication and coordination among organelles is likely critical.

73 Mitochondria are extensively associated with other organelles as part of the  
74 cellular energy distribution system<sup>1,13</sup> and these interactions are crucial for cellular  
75 metabolism and function<sup>1,14</sup>. For instance, mitochondria can form direct contact sites with

76 their lipid droplet (LD) fuel source, and these mitochondria are reported to be larger,  
77 longer, and have greater energy conversion capacity compared to non-LD connected  
78 mitochondria within the same cell<sup>10,15,16</sup>. Additionally, the dynamic nature of the physical  
79 contacts between mitochondria and the endo/sarcoplasmic reticulum<sup>17,18</sup> allows for firm  
80 regulation over both mitochondrial and cytosolic calcium levels which play a critical role  
81 in many cellular processes including energy homeostasis and cell viability<sup>19-21</sup>. In striated  
82 muscle cells, mitochondria can also be closely associated with the high energy  
83 demanding contractile machinery which takes up the majority of cellular volume. However,  
84 it remains unclear how mitochondria in different cell types and/or physiologic  
85 environments balance the need for physical interactions with multiple cellular structures  
86 as well as the cytosol in support of overall cellular function.

87 Here, we define the physical reorganization of the cellular energy distribution  
88 system supporting sustained skeletal muscle contraction across postnatal development.  
89 By combining the large field of view and nanometer resolution afforded by focused ion  
90 beam scanning electron microscopy (FIB-SEM)<sup>22,23</sup> with machine learning image  
91 segmentation<sup>24</sup>, we provide a high-throughput subcellular connectomics analysis<sup>10</sup> of the  
92 3D mitochondria-organelle interactions within developing skeletal muscle. We find that  
93 while tortuous mitochondria are loosely interspersed within the contractile machinery at  
94 birth<sup>25,26</sup>, frequent interactions among mitochondria, lipid droplets, and the sarcoplasmic  
95 reticulum take place in neonatal muscles. During maturation into either oxidative or  
96 glycolytic muscle types, a structural transition occurs where mitochondria become more  
97 linear in nature as well as more tightly associated with the contractile apparatus<sup>25,26</sup>.  
98 However, muscle maturation is also characterized by less frequent interactions among

99 mitochondria, lipid droplets, and sarcoplasmic reticulum including a near complete loss  
100 of lipid droplets in glycolytic muscle. These results reflect a functional redesign of the  
101 skeletal muscle cell during postnatal development where frequent organelle interactions  
102 support the need for coordinated cellular assembly at birth while the cellular energy  
103 distribution system becomes specifically tuned to support contractile function in the  
104 mature muscle cell.

105

## 106 **Results**

### 107 ***Dynamic reorganization of mitochondrial networks during postnatal development.***

108 To evaluate the mitochondria-organelle interactome during postnatal muscle  
109 development, we used FIB-SEM to collect mouse muscle cell volumes with 10 nm  
110 resolution in 3D at birth (postnatal day 1 (P1), **Supplementary Movie 1**), during the  
111 dynamic phase of the transition between neonatal and mature mitochondrial networks<sup>27</sup>  
112 (P14, **Supplementary Movie 2**), and after mitochondrial network structures had reached  
113 maturity<sup>27</sup> (P42, **Supplementary Movies 3-4**). To account for the muscle fiber type  
114 differences in mitochondrial intra- and inter-organelle interactions previously observed in  
115 mature muscles<sup>10</sup>, we imaged cells from both the soleus and gastrocnemius muscles  
116 representing more oxidative and glycolytic muscles, respectively<sup>28</sup>, and further confirmed  
117 cell type based on mitochondrial content<sup>10</sup>. Machine learning segmentation of the FIB-  
118 SEM muscle volumes<sup>10,24,29</sup> allowed for high-throughput analyses of mitochondrial, lipid  
119 droplet (LD), and sarcotubular (SR/T) structures as well as interactions among them.

120 Mitochondrial structure within a cell is coordinated across different spatial scales  
121 ranging from cell-wide networks to the size and shape of individual organelles to

122 interactions with adjacent organelles<sup>3,10</sup> (**Figure 1a-f**). Beginning at the cellular scale,  
123 networks of tortuous mitochondria were primarily aligned parallel to but loosely associated  
124 with the contractile apparatus in both newborn muscle types (**Figure 1a,d,l**,  
125 **Supplementary Movie 1**). Additionally, overall mitochondrial volume and number were  
126 similar between muscle types at birth (**Figure 1g-h**,  $6.3\pm 1.2\%$  and  $7.0\pm 0.4\%$  of total  
127 muscle volume,  $345\pm 20$  and  $313\pm 17$  mitochondria/1000  $\mu\text{m}^3$  muscle, mean $\pm$ SE, n=3  
128 muscle volumes, 618 and 276 mitochondria for P1 soleus and gastrocnemius,  
129 respectively). These data suggest that mitochondrial network configuration in neonatal  
130 muscles is driven by developmental status rather than muscle type at this stage. During  
131 the postnatal transition phase (P14), overall mitochondrial content and number were little  
132 changed from birth and were again no different between muscle types (**Figure 1g-h**,  
133  $10.8\pm 0.2\%$  and  $7.7\pm 1.9\%$  of total muscle volume,  $400\pm 26$  and  $443\pm 6$  mitochondria/1000  
134  $\mu\text{m}^3$  muscle, mean $\pm$ SE, n=3 muscle volumes, 1124 and 1848 mitochondria for P14 soleus  
135 and gastrocnemius, respectively). However, mitochondrial networks in both muscles  
136 began to more closely associate with the contractile apparatus at P14 (**Figure 1b,e**,  
137 **Supplementary Movie 2**). In the soleus, mitochondrial networks became more linear and  
138 elongated along the parallel axis and began to form short branches along the  
139 perpendicular axis at the ends of the sarcomeres near the z-disk (**Figure 1b,i**). In contrast,  
140 while the mitochondrial networks in the gastrocnemius muscle also became more linear  
141 and elongated compared to at birth (**Figure 1e**), there was a greater contribution of  
142 perpendicularly oriented mitochondrial branches compared to the soleus muscle (**Figure**  
143 **1i**). By P42, the divergence of mitochondrial network configurations between muscle  
144 types was completed (**Figure 1c,f**) as mitochondrial volume and number were

145 significantly higher in the oxidative compared to glycolytic muscles (**Figure 1g-h**,  
146  $10.8\pm 2.2\%$  and  $3.6\pm 0.3\%$  of total muscle volume,  $420\pm 37$  and  $247\pm 25$  mitochondria/1000  
147  $\mu\text{m}^3$  muscle, mean $\pm$ SE, n=3 muscle volumes, 1147 and 475 mitochondria for P42  
148 oxidative and glycolytic muscles, respectively), and the mitochondrial networks reached  
149 their mature grid-like (oxidative, **Supplementary Movie 3**) and primarily perpendicular  
150 (glycolytic, **Supplementary Movie 4**) orientations (**Figure 1c,f,i**). These data suggest  
151 that the timing of muscle fiber-type specificity of mitochondrial network structure occurs  
152 in concert with the fiber-type specificity of myosin isoform composition that occurs during  
153 postnatal development<sup>30,31</sup>.

154 At the single organelle level, the volume of individual mitochondria followed a  
155 similar time course to the overall mitochondrial content in both muscle types where  
156 content gradually increased across development in the oxidative muscles and fell in the  
157 glycolytic muscles (**Figure 1j**). These data indicate that mitochondrial functional capacity  
158 across both the network and individual organelle level may be coordinated together<sup>3</sup>.  
159 While there were no significant differences in mitochondrial surface area to volume (SA/V)  
160 ratio among individual groups (**Figure 1k**), gastrocnemius muscle mitochondria as a  
161 whole had greater SA/V ratios compared to soleus muscle mitochondria consistent with  
162 previous reports on glycolytic versus oxidative muscle mitochondria<sup>10,32,33</sup>. To further  
163 investigate how individual muscle mitochondrial morphology is altered across postnatal  
164 development, we quantified the relative number of small (~80-120 nm) donut-like holes  
165 in mitochondria (**Figure 1l inset**) which have been suggested as a marker of oxidative  
166 stress<sup>34</sup>. In soleus muscles, the number of mitochondrial donuts was highest at birth then  
167 dropped significantly at P14 and remained low in the mature muscle (**Figure 1l**,  $20.0\pm 2.4$ ,

168 3.3±0.6, and 1.5±0.4 mito donuts per 100  $\mu\text{m}^3$  mito volume, n=3 muscle volumes, 26, 10,  
169 and 5 donuts for P1, P14, and P42, respectively). In the gastrocnemius, there were no  
170 differences in the number of donuts compared to the soleus at birth. However, the relative  
171 number of mitochondrial donuts remained elevated at P14 and rose significantly to more  
172 than thirty-fold higher than in the oxidative muscles at P42 (**Figure 1l**, 20.6±1.6, 13.5±4.0,  
173 and 45.8±3.1 mito donuts per 100  $\mu\text{m}^3$  mito volume, n=3 muscle volumes, 17, 24, and 32  
174 donuts for P1, P14, and P42, respectively), suggesting that the increased oxidative stress  
175 reported previously in glycolytic muscles<sup>10</sup> may be reflected at the mitochondrial level  
176 beginning during the late postnatal phase of development.

177 To determine whether interactions among mitochondria were altered during  
178 postnatal muscle development, we assessed the size, abundance, and orientation of the  
179 intermitochondrial junctions (IMJs) between adjacent mitochondria which have been  
180 suggested to allow for rapid communication and distribution of molecules among  
181 physically coupled mitochondria<sup>35</sup>. The size of individual IMJs and relative abundance of  
182 IMJs per mitochondrion were both largely similar across muscle types and developmental  
183 timepoints with the exception of an increase in both size and abundance observed at P14  
184 in the soleus compared to the mature oxidative muscle (**Figure 1m,n**). Conversely, while  
185 there were no differences in IMJ orientation detected between muscle types, each muscle  
186 types demonstrated a loss of parallel and a gain of perpendicularly oriented IMJs upon  
187 maturation (**Figure 1o**). These data suggest that the putative physical coupling sites  
188 permitting transfer of signaling molecules, metabolites, and/or ions directly between  
189 adjacent mitochondria are primarily altered by changing their orientation within the cell  
190 rather than size or abundance during postnatal development.

191



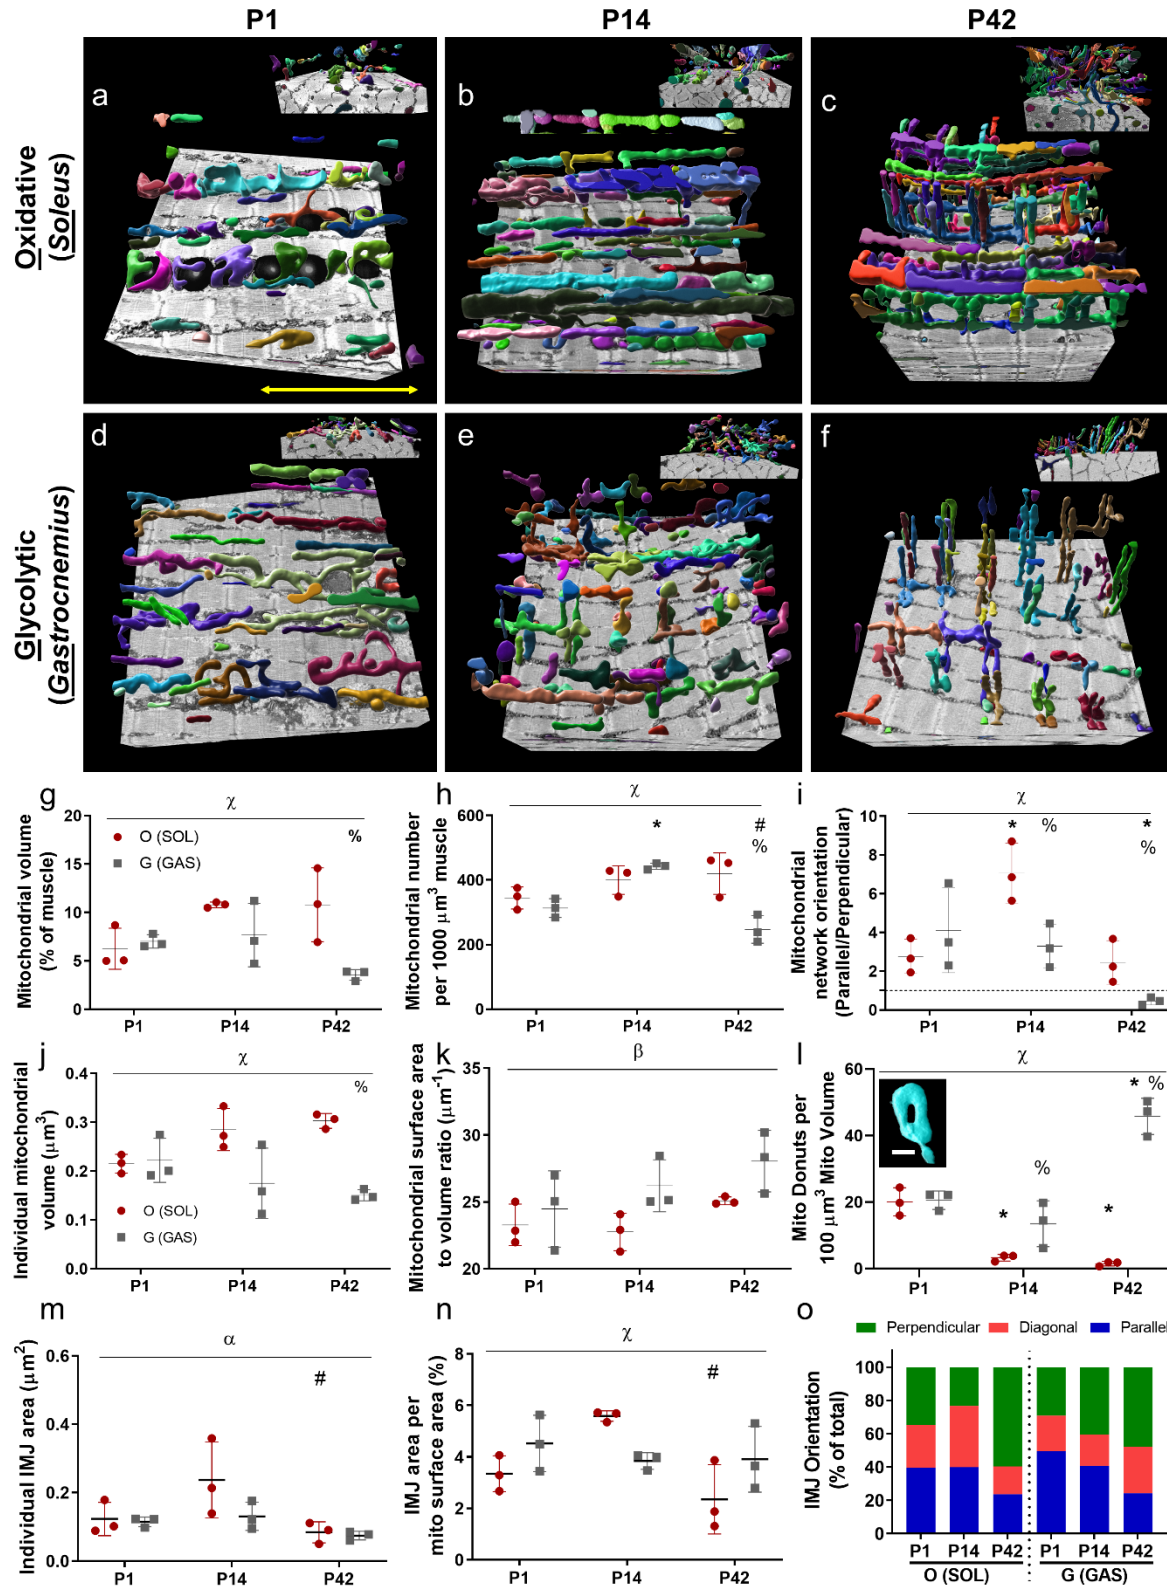

193 **Figure 1: Dynamic reorganization of mitochondrial networks during postnatal development. a-f)**  
194 Representative 3D rendering of individual mitochondria within networks in oxidative (O; SOL) and glycolytic  
195 (G; GAS) fibers of mice at postnatal (P) day 1, 14, and 42, respectively. Mitochondrial networks are  
196 arranged along muscle contraction axis (yellow arrow) and 90-degree rotated images are depicted in the  
197 upper-right corner. Each color indicates individual mitochondria. **g)** Total mitochondrial volume (% of muscle  
198 area). **h)** Mitochondrial number per 1000  $\mu\text{m}^3$  of muscle. **i)** Mitochondrial network orientations are calculated  
199 in ratio of parallel to perpendicular arrangement. **j)** Individual mitochondrial volume ( $\mu\text{m}^3$ ). **k)** Mitochondrial  
200 surface area to volume ratio ( $\mu\text{m}^{-1}$ ). **l)** Donut-shaped mitochondria are counted per 100  $\mu\text{m}^3$  of mitochondrial  
201 volume. Representative image is displayed in the upper-right corner. **m)** Individual IMJ area ( $\mu\text{m}^3$ ). **n)** IMJ  
202 area per mitochondrial surface area (%). **o)** Quantification of intermitochondrial junction (IMJ) orientation.  
203 N values: P1 oxidative – 609 mitochondria, 375 IMJ, 3 datasets; P14 oxidative – 1115 mitochondria, 523  
204 IMJ, 3 datasets; P42 oxidative – 1414 mitochondria, 509 IMJ, 3 datasets; P1 glycolytic – 274 mitochondria,  
205 173 IMJ, 3 datasets; P14 glycolytic – 1828 mitochondria, 786 IMJ, 3 datasets; P42 glycolytic – 462  
206 mitochondria, 263 IMJ, 3 datasets. Points are means for each dataset. Bars are means  $\pm$  SE. \* $P < 0.05$ , vs  
207 P1; # $P < 0.05$ , vs P14; % $P < 0.05$ , vs O (SOL); ;  $\alpha P < 0.05$ , main effect of development;  $\beta P < 0.05$ , main effect  
208 of fiber type;  $\gamma P < 0.05$ , interaction effect of development and fiber type. scale bar = 1  $\mu\text{m}$ .

209

210

211 ***Mitochondria-lipid droplet (LD) contact sites decrease in frequency across***  
212 ***postnatal development.***

213 To evaluate how mitochondrial interactions with other organelles were altered  
214 during postnatal muscle development, we began by assessing the size and content of the  
215 lipid droplets (**Figure 2a-c**) which provide a direct fuel source for mitochondrial oxidative  
216 phosphorylation. Overall muscle content and the size of individual lipid droplets were  
217 highest at birth in both muscle types followed by a significant decrease during the late  
218 postnatal stage that continued into maturation (**Figure 2d,e**). Contact sites between  
219 mitochondria and lipid droplets (i.e., membranes within 30 nm<sup>36</sup>) followed a similar pattern  
220 with a nearly ten-fold loss in lipid droplet contact site abundance per mitochondrion across  
221 postnatal development in the oxidative muscles and a complete loss of contact sites in  
222 mature glycolytic muscle where no lipid droplets were found (**Figure 2f**). These data  
223 suggest that physical interactions between mitochondria and lipid droplets, which facilitate

224 direct transfer of molecules between them, may be directly related to the metabolic fuel  
225 preferences of the skeletal muscle cell, as neonatal muscles are known to rely more  
226 heavily on fatty acids compared to adult muscles<sup>37</sup>, while glycolytic muscles rely more on  
227 carbohydrate fuel sources relative to oxidative muscles<sup>38</sup>.

228 We previously found that mitochondria in contact with lipid droplets provided a  
229 structural capacity for greater energy distribution compared to non-lipid connected  
230 mitochondria within the same adult muscle cells<sup>10</sup>. To determine whether this apparent  
231 structural specialization of mitochondria within a network was present beginning at birth,  
232 we assessed individual mitochondrial structural characteristics for lipid droplet connected  
233 and non-connected mitochondria separately. Individual mitochondrial volume, a proxy for  
234 the internal capacity of a mitochondrion, was consistently greater in lipid connected  
235 mitochondria for all muscles with lipid droplets present (**Figure 2g**). Conversely,  
236 mitochondrial SA/V ratio, an indicator of the relative capacity to interact with the  
237 surrounding environment, was lower in lipid droplet connected mitochondria across all  
238 timepoints and in both muscle types (**Figure 2h**). Additionally, the total IMJ area per  
239 mitochondrion, an indicator of molecular transfer capacity to mitochondria, trended higher  
240 in lipid droplet connected mitochondria (**Figure 2i**). Together, these data indicate that the  
241 structural, and likely functional, specialization of lipid droplet connected mitochondria for  
242 energy distribution capacity rather than interaction capacity has already begun at birth  
243 and is maintained throughout the maturation process.

244

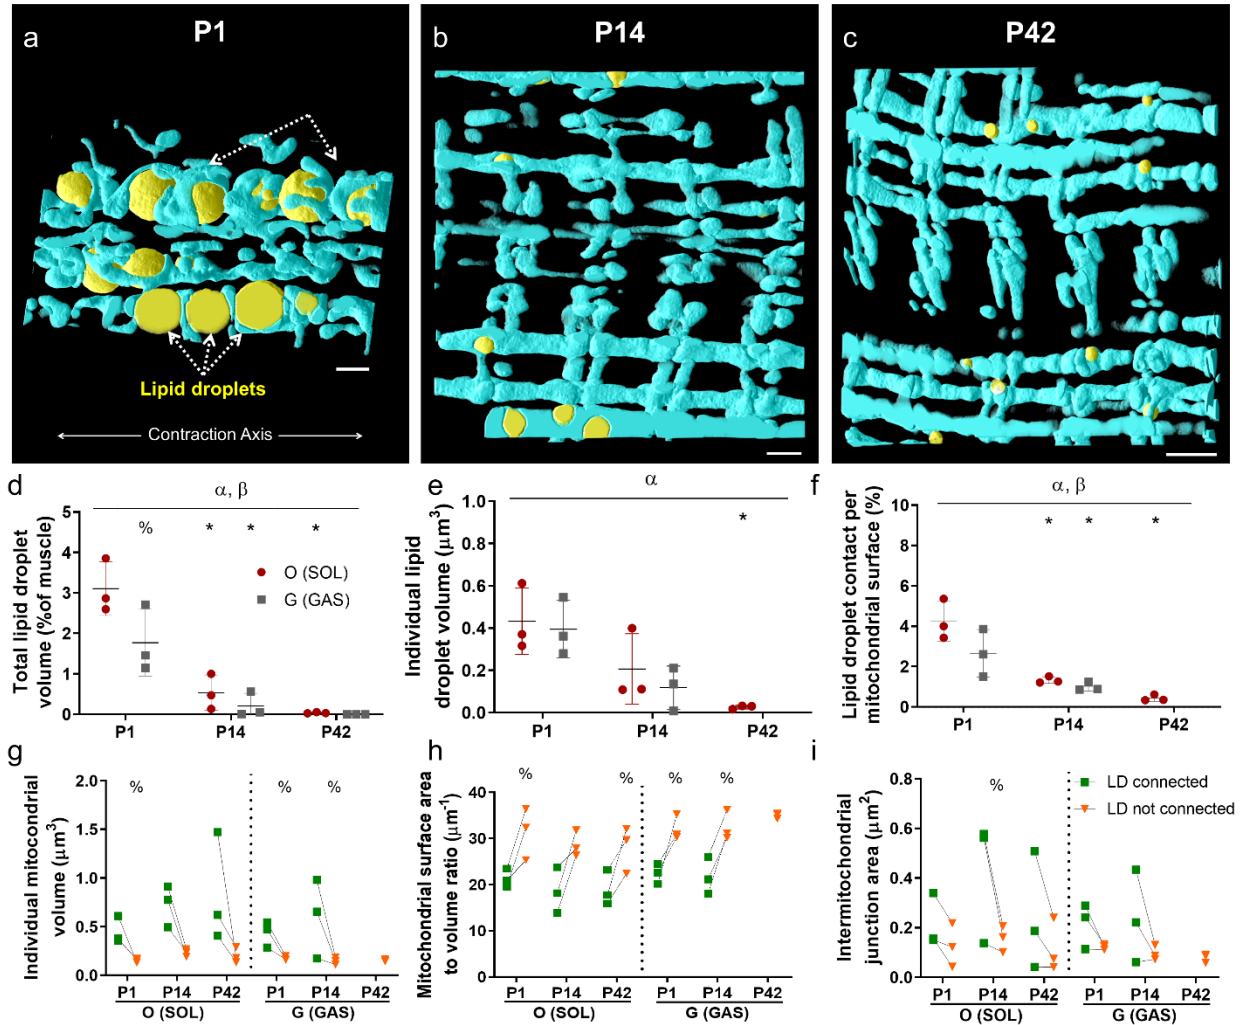

245

246 **Figure 2: Mitochondria-lipid droplet (LD) contact sites decrease in frequency across postnatal**  
 247 **development. a-c)** Representative 3D rendering of mitochondrial networks (colored in sky blue) and lipid  
 248 droplets (colored in yellow) of oxidative fibers of mice at postnatal (P) day 1, 14, and 42, respectively. All  
 249 images are aligned to contraction axis. **d)** Total lipid droplet volume (% of muscle). **e)** Individual lipid droplet  
 250 volume ( $\mu\text{m}^3$ ). N values: P1 oxidative – 183 LD, 3 datasets; P14 oxidative – 117 LD, 3 datasets; P42 – 81  
 251 LD, 3 datasets; P1 glycolytic – 53 LD, 3 datasets; P14 glycolytic – 89 LD, 3 datasets; P42 glycolytic – 0 LD,  
 252 3 datasets. **f)** LD contact per mitochondrial surface area (%). **g-i)** Individual mitochondrial volume ( $\mu\text{m}^3$ ; g),  
 253 Mitochondrial surface area to volume ratio ( $\mu\text{m}^{-1}$ ; h), and Intermitochondrial junction area ( $\mu\text{m}^2$ ; i) connected  
 254 with LD (*LD connected*) and non-connected with LD (*LD not connected*). N values (*LD connected*): P1  
 255 oxidative – 183 mitochondria, 3 datasets; P14 oxidative – 117 mitochondria, 3 datasets; P42 – 81  
 256 mitochondria, 3 datasets; P1 glycolytic – 53 mitochondria, 3 datasets; P14 glycolytic – 89 mitochondria, 3  
 257 datasets; P42 glycolytic – 0 mitochondria, 3 datasets; N values (*LD not connected*): P1 oxidative – 414  
 258 mitochondria, 3 datasets; P14 oxidative – 406 mitochondria, 3 datasets; P42 – 428 mitochondria, 3 datasets;  
 259 P1 glycolytic – 219 mitochondria, 3 datasets; P14 glycolytic – 697 mitochondria, 3 datasets; P42 glycolytic  
 260 – 263 mitochondria, 3 datasets. Points are means for each dataset. Bars represent means $\pm$ SE. \* $P < 0.05$ ,  
 261 vs P1; % $P < 0.05$ , vs O (SOL);  $\alpha P < 0.05$ , main effect of development.  $\beta P < 0.05$ , main effect of fiber type. Scale  
 262 bar = 1  $\mu\text{m}$ .

263

264

265 ***Mitochondria-sarcoplasmic reticulum interactions are highly abundant during***  
266 ***early postnatal development.***

267 To begin our evaluation of mitochondrial interactions with the SR/T throughout  
268 postnatal development, we first assessed the total muscle cell volume occupied by the  
269 SR/T. At birth, the SR/T formed an unorganized mesh wrapping around the myofibrils  
270 with no difference in total volume between muscle types (**Figure 3a,c,e**), similar to  
271 previous work in mice<sup>39,40</sup>. During maturation, the SR/T became more organized into the  
272 well-known longitudinal SR mesh and SR/T triads wrapping around the myofibrils (**Figure**  
273 **3b,d**) with SR/T in the mature glycolytic muscle occupying a greater volume than in  
274 newborn muscles or mature oxidative muscle (**Figure 3e**), also in line with previous  
275 reports<sup>10,39,41</sup>. These data demonstrate the cell-type specification of the SR/T as well as  
276 the consistency between our 3D analysis and previous 2D assessments of SR/T volume.

277 Next, we assessed the physical interactions between the SR/T and 5332 individual  
278 mitochondria during postnatal development. Nearly, every mitochondrion across all  
279 conditions had at least one contact (membranes within 30 nm) with the SR/T (99.6±0.5,  
280 99.6±0.2, 99.4±0.2, 99.3±0.3, 99.6±0.2, 98.3±1.2% of mitochondria in contact with SR/T,  
281 n=300, 570, 1847, 1124, 468, 1023 mitochondria in 3 datasets for P1 gastrocnemius, P1  
282 soleus, P14 gastrocnemius, P14 soleus, P42 glycolytic, and P42 oxidative, respectively).  
283 The triadic nature of the interactions between the t-tubules and the sarcoplasmic  
284 reticulum (SR) means that most of the t-tubule surface is covered by the SR<sup>40</sup>, and, as a  
285 result, the mitochondrial interactions with the SR/T volume detected here are almost  
286 exclusively interactions between mitochondria and the SR. At birth, roughly one-sixth of



287 the mitochondrial surface area was in direct contact with the SR/T on average with more  
288 than 80% of mitochondria having at least 10% of its surface area in contact with the SR/T  
289 (**Figure 4f,g**,  $16.6 \pm 2.2$  and  $17.3 \pm 2.3\%$  mitochondrial surface area contact with SR/T,  
290  $83.5 \pm 7.9$  and  $84.3 \pm 10.7\%$  of mitochondria with  $>10\%$  surface area contact with SR/T,  
291  $n=300$  and  $570$  mitochondria in 3 datasets for P1 gastrocnemius and P1 soleus,  
292 respectively). By two weeks of age, interactions between mitochondria and the SR/T fell  
293 by more than two-fold for mean surface area contact and more than four-fold for  
294 percentage of mitochondria with at least 10% surface area in contact and were  
295 maintained at this level into maturity for both muscle types (**Figure 4f,g**,  $7.0 \pm 1.1$ ,  $6.1 \pm 0.6$ ,  
296  $8.1 \pm 0.6$ , and  $6.8 \pm 0.4\%$  mitochondrial surface area contact with SR/T,  $18.0 \pm 6.7$ ,  $15.2 \pm 1.9$ ,  
297  $18.5 \pm 1.1$ , and  $17.1 \pm 1.8\%$  of mitochondria with  $>10\%$  surface area contact with SR/T,  
298  $n=1847$ ,  $1124$ ,  $468$ , and  $1023$  mitochondria in 3 datasets for P14 gastrocnemius, P14  
299 soleus, P42 glycolytic and P42 oxidative, respectively). These data demonstrate the  
300 ubiquitous yet dynamic nature of mitochondrial interactions with the SR in muscle cells  
301 and suggests that mitochondria with high SR/T contact areas may be tailored for a  
302 different functional specialization compared with lower SR/T contacting mitochondria.

303 To investigate a potential difference in functional specialization among  
304 mitochondria with high and low SR/T contact, we compared the structural capacities of  
305 mitochondria with more or less than 10% surface area contact with the SR/T (**Figure 4g-**  
306 **j**). At birth, high SR/T contact mitochondria were larger and had lower SA/V ratios than  
307 low SR/T contact mitochondria in gastrocnemius muscle (**Figure 4h,i**), suggesting a  
308 relatively greater internal capacity but lower interaction capacity for high SR/T contact  
309 mitochondria. However, this trend was reversed by P14 and into maturity where high

310 SR/T contact mitochondria were smaller and had higher SA/V ratios compared to low  
311 SR/T contact mitochondria in soleus muscles (**Figure 4h,i**). There were no significant  
312 differences in mitochondrion-to-mitochondrion interactions through IMJs between high  
313 and low SR/T contact groups (**Figure 4j**). These data imply that the functional specificity  
314 of mitochondria-SR membrane contact sites may undergo a developmental switch and  
315 are not directly related to the capacity for molecular transfer through mitochondrial  
316 networks.  
317

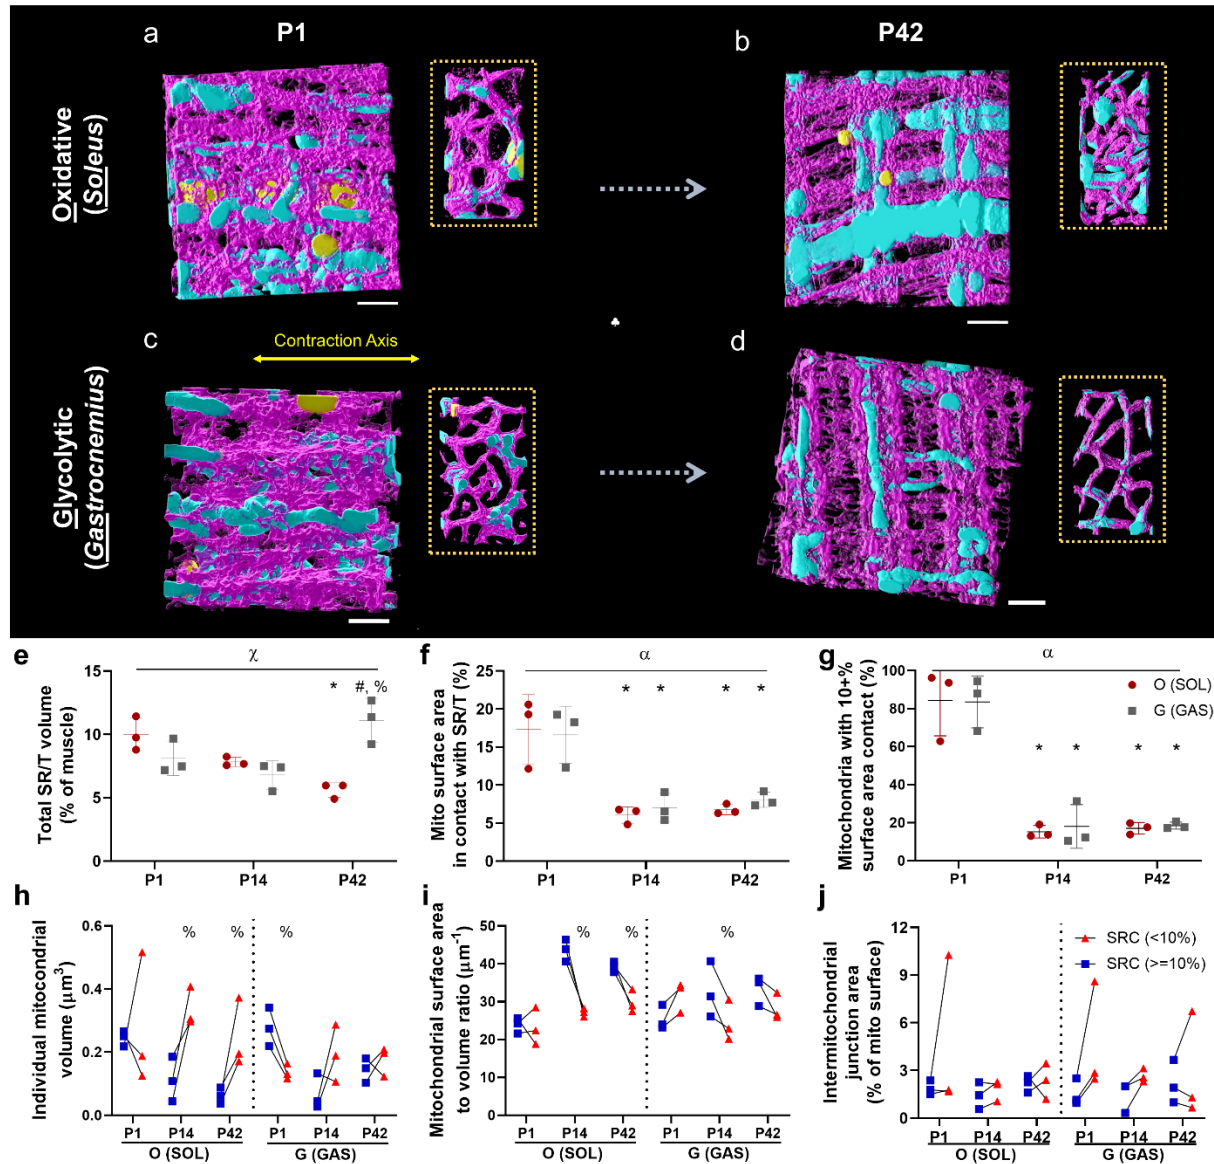

318

319

320 **Figure 3: Mitochondria-sarcoplasmic reticulum interactions are highly abundant during early**

321 **postnatal development. a-d)** Representative 3D rendering of mitochondrial network (colored in sky blue

322 color), sarcoplasmic reticulum/t-tubules (SR/T; colored in magenta), and lipid droplets (colored in yellow) in

323 oxidative (O: SOL) and glycolytic (G: GAS) fibers of mice at postnatal (P) day 1 and 42, respectively. These

324 3D images are arranged along muscle contraction axis and the 90-degree rotated images are depicted in

325 the box of dotted lines. **e)** Total SR/T volume (% of muscle). **f)** Mitochondrial surface area in contact with

326 SR/T (%). N values: P1 oxidative – 566 Mitochondria in contact with SR/T (M-SR/T), 3 datasets; P14

327 oxidative – 1111 M-SR/T, 3 datasets; P42 – 1023 M-SR/T, 3 datasets; P1 glycolytic – 296 M-SR/T, 3

328 datasets; P14 glycolytic – 1811 M-SR/T, 3 datasets; P42 glycolytic – 458 M-SR/T, 3 datasets. **g)**

329 Mitochondria with at least 10% surface area contact with SR/T (%). N values: P1 oxidative – 566

330 Mitochondria in contact with SR/T (M-SR/T), 3 datasets; P14 oxidative – 1111 M-SR/T, 3 datasets; P42 –

331 1023 M-SR/T, 3 datasets; P1 glycolytic – 296 M-SR/T, 3 datasets; P14 glycolytic – 1811 M-SR/T, 3

332 datasets; P42 glycolytic – 458 M-SR/T, 3 datasets **h-j)** Individual mitochondrial volume ( $\mu\text{m}^3$ ; h), Mitochondrial surface

333 area to volume ratio ( $\mu\text{m}^{-1}$ ; i), and Intermitochondrial junction area (% of mito surface area; j) in mitochondria



334 highly connected with SR/T ( $\geq 10\%$  SRC [large area connected] vs.  $< 10\%$  SRC [less area connected]). N  
335 values ( $\geq 10\%$  SRC): P1 oxidative – 494 mitochondria, 3 datasets; P14 oxidative – 131 mitochondria, 3  
336 datasets; P42 – 174 mitochondria, 3 datasets; P1 glycolytic – 252 mitochondria, 3 datasets; P14 glycolytic  
337 – 354 mitochondria, 3 datasets; P42 glycolytic – 110 mitochondria, 3 datasets; N values ( $< 10\%$  SRC): P1  
338 oxidative – 72 mitochondria, 3 datasets; P14 oxidative – 980 mitochondria, 3 datasets; P42 – 849  
339 mitochondria, 3 datasets; P1 glycolytic – 44 mitochondria, 3 datasets; P14 glycolytic – 1457 mitochondria,  
340 3 datasets; P42 glycolytic – 348 mitochondria, 3 datasets. Points are means for each dataset. Bars  
341 represent means $\pm$ SE. \* $P < 0.05$ , vs P1; % $P < 0.05$ , vs O (SOL); # $P < 0.05$ , vs P14; % $P < 0.05$ , interaction  
342 effect of development and fiber type;  $^{\alpha}P < 0.05$ , main effect of development. Scale bar = 1  $\mu$ m.

343

344

345 ***Specialized mitochondria-organelle interactions are a key feature of cellular***  
346 ***assembly during postnatal development***

347 To evaluate the integrated role of mitochondria-organelle contact sites during  
348 postnatal muscle development, we assessed how the total mitochondrial outer membrane  
349 surface area dedicated to membrane contact sites changed across time points in both  
350 muscle types (**Figure 4**). At birth, nearly one-quarter of mitochondrial surface area was  
351 in direct contact with adjacent organelles in both muscle types (**Figure 4a,b,i**,  $24.6 \pm 2.9$   
352 and  $23.7 \pm 1.7\%$  surface area contact per mitochondrion,  $n = 3$  datasets each for P1 soleus  
353 and P1 gastrocnemius, respectively). However, by P14, membrane contact site  
354 abundance had dropped by nearly half and remained at that level throughout  
355 development (**Figure 4c-i**,  $13.0 \pm 0.7$ ,  $11.9 \pm 1.3$ ,  $9.6 \pm 1.1$ , and  $11.9 \pm 1.0\%$  surface area  
356 contact per mitochondrion,  $n = 3$  datasets each for P14 soleus, P14 gastrocnemius, P42  
357 oxidative, and P42 glycolytic, respectively). These data suggest that mitochondria-  
358 organelle interactions may play a critical role in coordinating muscle cell assembly during  
359 the early postnatal period, while fewer interactions are needed to provide specialized  
360 support for muscle contraction in mature muscle cells.

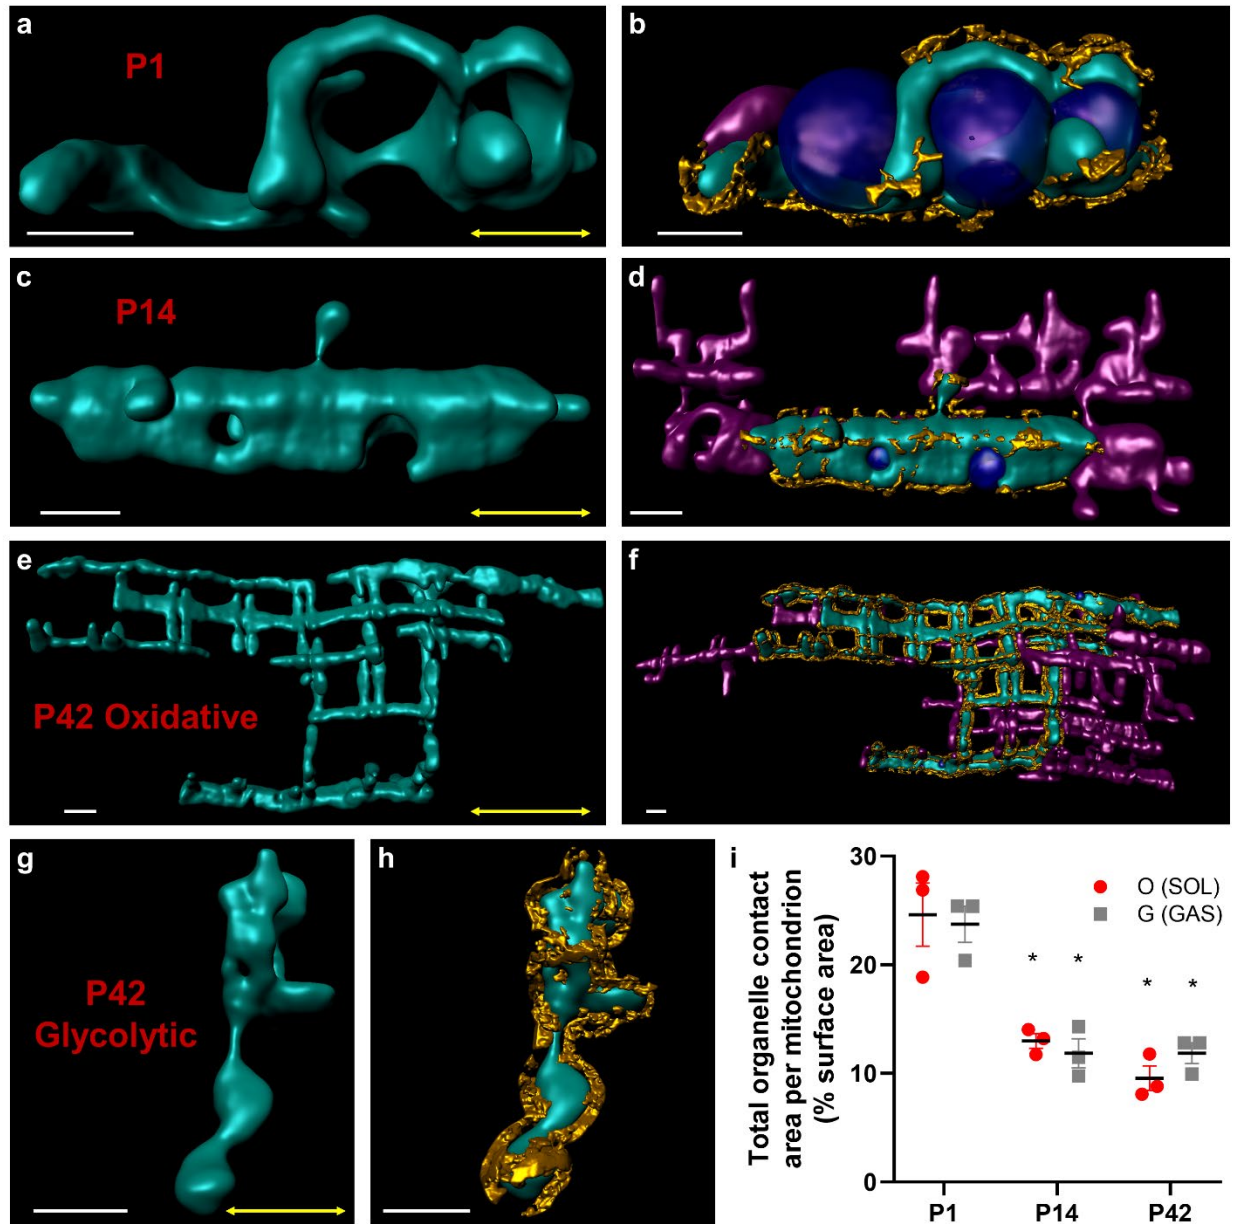

361

362

363

364 **Figure 4: Specialized mitochondria-organelle interactions transition from supporting cellular**  
 365 **assembly to contractile function in skeletal muscle cells. a,b)** Representative single P1  
 366 mitochondrion (green) alone (a) and in contact (b) with other mitochondria (magenta), lipid droplets (blue),  
 367 and SR/T (gold). **c,d)** Representative single P14 mitochondrion alone (c) and in contact (d) with other  
 368 mitochondria, lipid droplets, and SR/T. **e,f)** Representative single P42 oxidative mitochondrion alone (e)  
 369 and in contact (f) with other mitochondria, lipid droplets, and SR/T. **g,h)** Representative single P42  
 370 glycolytic mitochondrion alone (g) and in contact (h) with the SR/T. **i)** Total mitochondria-organelle contact  
 371 area (%) per mitochondrion. Data equivalent to sum of figures 1n+2f+3f.

372

## 373 **Discussion**

374 By performing subcellular connectomic analyses of the nanoscale 3D  
375 mitochondria-organelle interactions within skeletal muscle cells across postnatal  
376 development, we demonstrate a physical reorganization of the cellular energy distribution  
377 system reflecting a functional transition away from cellular assembly and towards focused  
378 support of contractile function. Skeletal muscle in newborn mice were characterized by  
379 tortuous mitochondrial networks arranged in parallel to the contractile axis of the cell with  
380 frequent contact sites between mitochondria and lipid droplet or sarcoplasmic reticulum  
381 membranes. However, despite being placed directly between the myofibrils, the worm-  
382 like appearance of the neonatal mitochondria resulted in relatively less of the  
383 mitochondrial surface area being located directly adjacent to the contractile apparatus.  
384 Thus, the organization of the newborn muscle cell reflects an increased functional  
385 capacity for direct communication between organelles, lipid metabolism, and calcium  
386 signaling, the latter two of which have been suggested to play key roles in cellular  
387 assembly and development<sup>42-46</sup>. Conversely, regardless of whether the number of  
388 mitochondria increased (oxidative) or decreased (glycolytic) or whether mitochondria  
389 converted to grid-like (oxidative) or perpendicularly oriented (glycolytic) networks,  
390 interactions between mitochondria and other organelles fell nearly two-fold during  
391 postnatal development while the more linear mitochondrial segments in mature muscles  
392 formed tighter associations with the adjacent contractile structures. These data suggest  
393 that the mitochondrial outer membrane surface area in mature muscle is specialized to  
394 directly support the energetic requirements of muscle contractions independent of  
395 mitochondrial content or network configuration.

396 Individual mitochondria also appear capable of specialization relative to their  
397 adjacent neighbors within a mitochondrial network<sup>10</sup>. We show here that mitochondria  
398 connected to lipid droplets throughout postnatal skeletal muscle development are larger  
399 and more connected to adjacent mitochondria compared to non-lipid droplet connected  
400 mitochondria which have greater SA/V ratios. Thus, muscle mitochondria connected to  
401 lipid droplets have a greater structural capacity for energy conversion (i.e., greater internal  
402 volume) and rapid molecular transfer through mitochondrial networks (i.e., greater IMJ  
403 area) and less capacity for interactions with other cellular structures (i.e., lower available  
404 surface area relative to volume). This morphological distinction of lipid droplet connected  
405 mitochondria is consistent across postnatal development and has also been reported in  
406 mature heart muscle<sup>10</sup> suggesting that lipid droplet connected mitochondria in all striated  
407 muscles may be functionally specialized to utilize the adjacent lipid fuel source and  
408 distribute the converted energy throughout the mitochondrial network to adjacent  
409 mitochondria which are structurally more suited for molecular distribution to other cellular  
410 components. However, while the relationship formed by membrane contact sites between  
411 mitochondria and lipid droplets appears consistent across striated muscles, a different  
412 type of functional specialization occurs in brown adipose tissue where lipid droplet  
413 connected mitochondria appear to be functionally specialized to support building lipid  
414 droplets rather than breaking them down for fuel<sup>5,47</sup>. As such, future work to gain a better  
415 understanding of the molecular nature of the tethers linking lipid droplets and  
416 mitochondria and how it may differ between muscle and brown fat cells may offer some  
417 insight into how certain tethers facilitate specific functions.

418 Contact sites between mitochondria and the endo/sarcoplasmic reticulum have  
419 been shown to play important roles in many cellular processes including mitochondrial  
420 dynamics<sup>48,49</sup>, calcium signaling<sup>50,51</sup>, lipid synthesis<sup>50</sup>, ubiquinone synthesis<sup>52</sup>, and cell  
421 death<sup>53</sup>. However, while the specific functional role of interactions between mitochondria  
422 and SR in skeletal muscle remains unclear<sup>54</sup>, the focus of much of the muscle work to  
423 date has revolved around the role of these organelle interactions in calcium signaling.  
424 Previous investigation into the postnatal relationship between mitochondria and SR/t-  
425 tubule triads found that the abundance of tethers linking mitochondria to these calcium  
426 release units (CRUs) was greater in mature than in two-week old mouse muscles<sup>55</sup>.  
427 Conversely, we found here that mitochondria-SR contact site abundance was greatest at  
428 birth and then fell significantly at two weeks of age and was maintained at the lower level  
429 until maturation. While the 3D nature of the current analyses versus the 2D nature of the  
430 previous study<sup>22</sup> may play a role in this discrepancy, it is more likely due to the specificity  
431 of the previous analyses only to mitochondria-SR tethers located at CRUs whereas our  
432 analysis was not restricted to specific subcellular domains. The functional coupling of the  
433 SR and t-tubule triads likely specializes the calcium signaling in this region to support  
434 skeletal muscle excitation-contraction coupling. Thus, it is not surprising, and is consistent  
435 with the rest of this study, that mitochondrial interactions with CRUs would increase during  
436 the postnatal developmental reorganization period in order to more optimally support  
437 contraction in mature muscles. The current data combined with the previous study also  
438 suggest that it is the regions of the SR that are not part of the triads that account for the  
439 high abundance of mitochondria-SR contacts observed in the muscle at birth here. Indeed,  
440 in neonatal muscles, the SR is frequently associated with ribosomal granules<sup>56</sup>, which

441 suggests that the SR has a greater capacity for classical endoplasmic reticulum functions  
442 such as protein synthesis<sup>57,58</sup> at this time point and it is consistent with a role in cellular  
443 assembly. Additionally, calcium signaling may still take place in the non-triadic  
444 mitochondria-SR contacts observed in neonatal muscles, as calcium activity beyond its  
445 role in muscle contraction is known to be important for postnatal muscle development and  
446 cellular assembly<sup>42-44</sup>, and the abundance of the mitochondrial calcium uniporter is higher  
447 in both myotubes and neonatal muscles than in mature skeletal muscle<sup>27,59</sup>. Again,  
448 detailing the molecular nature of the tethers linking the SR and mitochondria in skeletal  
449 muscle and how it may differ between subcellular domains would provide key insight into  
450 the major molecular exchanges occurring at these specialized contact sites.

451 Building a skeletal muscle cell into a specialized contractile fiber requires the  
452 coordination of several different organelles, first to assemble and synthesize the  
453 structures needed, and then to reorganize the cell into the optimal configuration to meet  
454 the given contractile demands. During the neonatal phase in which cellular assembly is  
455 ongoing, the mitochondrial outer membrane maintains abundant contact with both the SR  
456 and large lipid droplets. In the dynamic phase of the transition towards functional  
457 specialization for contraction, the frequency of interactions between mitochondrial and  
458 SR membranes in the muscle cell decreases quickly, whereas the reduction in  
459 mitochondria-lipid droplet interactions drops more gradually. Finally, upon maturation, the  
460 mitochondrial outer membrane surface area becomes optimized to provide energetic  
461 support through molecular exchange with the surrounding contractile apparatus. Thus,  
462 these data reflect that, in addition to cellular organelle content and composition, organelle  
463 configuration is also highly tuned to the functional demands of the cell.

## 464 **Methods**

### 465 ***Mice***

466 C57BL6/N mice (~6-8 weeks old) were obtained from Taconic Biosciences (Rensselaer,  
467 NY) and were used as breeding pairs. Their offspring was randomly assigned as postnatal  
468 (P) 1, P14, and P42 group (n=3-4 per group). All pups were weaned at P21-P28, and  
469 both breeders and weaned animals accessed to food and water *ad libitum*. The vivarium  
470 was maintained on a 12:12 h light and dark cycle at 20-26 °C. Due to a technical limitation  
471 in using anogenital distance to ascertain sex in P1 pups, we randomly used male and  
472 female animals rather than separating experimental groups by sex. All animal procedures  
473 were approved by the National Heart, Lung, and Blood Institute Animal Care and Use  
474 Committee and performed in accordance with the guidelines described in the Animal Care  
475 and Welfare Act (7 USC 2142 § 13).

### 476 ***Muscle Sample Preparation***

477 As in a previous study<sup>10</sup>, both soleus (oxidative) and gastrocnemius (glycolytic) muscle  
478 fibers were carefully excised and fixed for FIB-SEM imaging acquisition. Briefly, skin-  
479 peeled hindlimbs were submerged in fixative solution (2% glutaraldehyde in 0.1M  
480 phosphate buffer, pH 7.2) for 30 minutes, while mice were under anesthetization with 2%  
481 isoflurane by nosecone. After one-hour incubation in standard fixative solution (2.5%  
482 glutaraldehyde, 1% formaldehyde, 0.12 M sodium cacodylate, pH 7.2–7.4), the excised  
483 tissues were subsequently post-fixed and *en bloc* stained (i.e., 2% aqueous osmium  
484 tetroxide incubation) following the published protocol with minor modifications<sup>10</sup>. After an  
485 overnight incubation in 1% uranyl acetate solution at 4 °C, the samples were incubated  
486 at 60 °C for 20 min with Walton's lead aspartate (0.02 M lead nitrate, 0.03 M aspartic acid,



487 pH 5.5) and were thoroughly washed with distilled H<sub>2</sub>O at room temperature. Afterwards,  
488 the samples were gradually dehydrated with ethanol and were then incubated in 25%,  
489 50%, 75%, and 100% Embed 812 resin solutions for ~36 hours. Then, the tissue samples  
490 were placed on ZEISS SEM specimen mounts (Electron Microscopy Sciences, #75225,  
491 USA) and were polymerized at 60 °C for 2-3 days. After the polymerization, the samples  
492 were cut and polished by Leica UCT Ultramicrotome (Leica Microsystems Inc., USA) that  
493 carried Trimtool 90 diamond knives (DiATOME, Switzerland).

#### 494 ***FIB-SEM imaging***

495 The ZEISS crossbeam 540 (Gemini II) was used to collect FIB-SEM images at 10 nm  
496 voxel size with ZEISS Atlas 5 software (Carl Zeiss Microscopy GmbH, Jena, Germany).  
497 The FIB milling (10 nm thickness) was conducted at 30 keV, while maintaining a beam  
498 current at 2–2.5 nA. All collected micrographs were aligned with a proprietary algorithm  
499 and then exported as 8-bit TIFF files for further imaging analysis.

#### 500 ***Segmentation of cellular structures***

501 All image processing was conducted on a desktop PC (New Tech Solutions, Fremont,  
502 CA) equipped with an Intel Xeon W-2155 (3.3 GHz processor, 10 cores/20 threads) and  
503 256 GB RAM. As done previously<sup>10</sup>, Ilastik pixel classification software (Ilastik.org) was  
504 used for semi-automated image classification and segmentation of 3D structures of  
505 mitochondria and other subcellular organelles including lipid droplets, sarcoplasmic  
506 reticulum, and t-tubules. Also as done previously<sup>10</sup>, individual mitochondria were  
507 segmented using the Multicut module in Ilastik. All data were exported as a 32-bit HDF  
508 file for imaging analysis with ImageJ (National Institutes of Health, Bethesda, MD,  
509 ImageJ.net).



## 510 ***Imaging Analysis***

511 After loading with the HDF5 plugin, all HDF image datasets were processed to investigate  
512 both mitochondrial network configurations and individual mitochondrial structures.  
513 Following the established analytical pipeline<sup>10</sup>, several ImageJ plugins and analytical  
514 tools were used to examine mitochondrial networks (OrientationJ Distributions plugin),  
515 individual mitochondrial structures (ROIManager3D plugin), intermitochondrial junctions  
516 (Image Calculator tool), and mitochondrial spatial interactions with other subcellular  
517 components (Image Calculator tool and 3D Geometrical Measure tool). All 3D  
518 mitochondrial and subcellular components were extracted and visualized using 3D viewer  
519 and volume viewer on ImageJ or in Imaris.

## 520 ***Statistical Analysis***

521 Using Excel 2016 (Microsoft, Redmond, WA) and Prism 8 (GraphPad, San Diego, CA),  
522 we conducted all statistical analyses. Two-Way ANOVA was used to assess mean values  
523 of each dataset within and between groups (Fiber Type [Glycolytic, Oxidative] ×  
524 Development [P1, P14, P42]). Tukey's HSD *post hoc* tests were used for multiple  
525 comparisons and a statistical significance level was set at  $P < 0.05$ .

## 526 ***Data and Code Availability***

527 The raw FIB-SEM datasets for the present study have not been deposited in a public  
528 repository but are available from the corresponding author on reasonable request.

529

530

531

532 **Acknowledgements**

533 This study was supported by the Division of Intramural Research of the National Heart  
534 Lung and Blood Institute and the Intramural Research Program of the National Institute  
535 of Arthritis and Musculoskeletal and Skin Diseases.

536 **Author Contributions**

537 YK and BG prepped tissues for imaging. YK, EL, CKEB, and BG designed and EL and  
538 CKEB conducted imaging acquisitions. YK and BG designed and performed imaging  
539 analysis and made figures. YK and BG wrote the manuscript. YK, EL, CKEB, and BG  
540 edited and approved the manuscript.

541 **Declaration of Interests**

542 The authors declare no competing interests.

543

544

545

546

547

548

549

550

551

552

553

554

555

## 556 References

- 557 1 Glancy, B. Visualizing Mitochondrial Form and Function within the Cell. *Trends*  
558 *Mol Med* **26**, 58-70, doi:10.1016/j.molmed.2019.09.009 (2020).
- 559 2 van Bergeijk, P., Hoogenraad, C. C. & Kapitein, L. C. Right Time, Right Place:  
560 Probing the Functions of Organelle Positioning. *Trends Cell Biol* **26**, 121-134,  
561 doi:10.1016/j.tcb.2015.10.001 (2016).
- 562 3 Glancy, B., Kim, Y., Katti, P. & Willingham, T. B. The Functional Impact of  
563 Mitochondrial Structure Across Subcellular Scales. *Frontiers in physiology* **11**,  
564 1462 (2020).
- 565 4 Murgia, M. *et al.* Single Muscle Fiber Proteomics Reveals Fiber-Type-Specific  
566 Features of Human Muscle Aging. *Cell Rep* **19**, 2396-2409,  
567 doi:10.1016/j.celrep.2017.05.054 (2017).
- 568 5 Benador, I. Y. *et al.* Mitochondria Bound to Lipid Droplets Have Unique  
569 Bioenergetics, Composition, and Dynamics that Support Lipid Droplet Expansion.  
570 *Cell metabolism* **27**, 869-885 e866, doi:10.1016/j.cmet.2018.03.003 (2018).
- 571 6 Olzmann, J. A. & Carvalho, P. Dynamics and functions of lipid droplets. *Nat Rev*  
572 *Mol Cell Biol* **20**, 137-155, doi:10.1038/s41580-018-0085-z (2019).
- 573 7 Gottschling, D. E. & Nystrom, T. The Upsides and Downsides of Organelle  
574 Interconnectivity. *Cell* **169**, 24-34, doi:10.1016/j.cell.2017.02.030 (2017).
- 575 8 Lewis, S. C., Uchiyama, L. F. & Nunnari, J. ER-mitochondria contacts couple  
576 mtDNA synthesis with mitochondrial division in human cells. *Science* **353**,  
577 aaf5549, doi:10.1126/science.aaf5549 (2016).
- 578 9 Herms, A. *et al.* AMPK activation promotes lipid droplet dispersion on  
579 deetyrosinated microtubules to increase mitochondrial fatty acid oxidation. *Nat*  
580 *Commun* **6**, 7176, doi:10.1038/ncomms8176 (2015).
- 581 10 Bleck, C. K. E., Kim, Y., Willingham, T. B. & Glancy, B. Subcellular connectomic  
582 analyses of energy networks in striated muscle. *Nature communications* **9**, 5111,  
583 doi:10.1038/s41467-018-07676-y (2018).
- 584 11 Lopez-Crisosto, C. *et al.* Sarcoplasmic reticulum-mitochondria communication in  
585 cardiovascular pathophysiology. *Nat Rev Cardiol* **14**, 342-360,  
586 doi:10.1038/nrcardio.2017.23 (2017).
- 587 12 Annunziata, I., Sano, R. & d'Azzo, A. Mitochondria-associated ER membranes  
588 (MAMs) and lysosomal storage diseases. *Cell Death Dis* **9**, 328,  
589 doi:10.1038/s41419-017-0025-4 (2018).
- 590 13 Giacomello, M., Pyakurel, A., Glytsou, C. & Scorrano, L. The cell biology of  
591 mitochondrial membrane dynamics. *Nat Rev Mol Cell Biol* **21**, 204-224,  
592 doi:10.1038/s41580-020-0210-7 (2020).
- 593 14 Gordaliza-Alaguero, I., Canto, C. & Zorzano, A. Metabolic implications of  
594 organelle-mitochondria communication. *EMBO Rep* **20**, e47928,  
595 doi:10.15252/embr.201947928 (2019).
- 596 15 Benador, I. Y., Veliova, M., Liesa, M. & Shirihai, O. S. Mitochondria Bound to  
597 Lipid Droplets: Where Mitochondrial Dynamics Regulate Lipid Storage and  
598 Utilization. *Cell Metab* **29**, 827-835, doi:10.1016/j.cmet.2019.02.011 (2019).
- 599 16 Gemmink, A. *et al.* Super-resolution microscopy localizes perilipin 5 at lipid  
600 droplet-mitochondria interaction sites and at lipid droplets juxtaposing to perilipin

- 601 2. *Biochim Biophys Acta Mol Cell Biol Lipids* **1863**, 1423-1432,  
602 doi:10.1016/j.bbalip.2018.08.016 (2018).
- 603 17 Hamasaki, M. *et al.* Autophagosomes form at ER-mitochondria contact sites.  
604 *Nature* **495**, 389-393, doi:10.1038/nature11910 (2013).
- 605 18 Merkwirth, C. & Langer, T. Mitofusin 2 builds a bridge between ER and  
606 mitochondria. *Cell* **135**, 1165-1167, doi:10.1016/j.cell.2008.12.005 (2008).
- 607 19 Raffaello, A., Mammucari, C., Gherardi, G. & Rizzuto, R. Calcium at the Center  
608 of Cell Signaling: Interplay between Endoplasmic Reticulum, Mitochondria, and  
609 Lysosomes. *Trends Biochem Sci* **41**, 1035-1049, doi:10.1016/j.tibs.2016.09.001  
610 (2016).
- 611 20 Glancy, B., Willis, W. T., Chess, D. J. & Balaban, R. S. Effect of calcium on the  
612 oxidative phosphorylation cascade in skeletal muscle mitochondria. *Biochemistry*  
613 **52**, 2793-2809, doi:10.1021/bi3015983 (2013).
- 614 21 McCormack, J. G. & Denton, R. M. Role of calcium ions in the regulation of  
615 intramitochondrial metabolism. Properties of the Ca<sup>2+</sup>-sensitive dehydrogenases  
616 within intact uncoupled mitochondria from the white and brown adipose tissue of  
617 the rat. *Biochem J* **190**, 95-105 (1980).
- 618 22 Glancy, B. *et al.* Mitochondrial reticulum for cellular energy distribution in muscle.  
619 *Nature* **523**, 617-620, doi:10.1038/nature14614 (2015).
- 620 23 Heymann, J. A. *et al.* Site-specific 3D imaging of cells and tissues with a dual  
621 beam microscope. *J Struct Biol* **155**, 63-73, doi:10.1016/j.jsb.2006.03.006 (2006).
- 622 24 Sommer, C., Straehle, C., Kothe, U. & Hamprecht, F. A. Ilastik: Interactive  
623 Learning and Segmentation Toolkit. *I S Biomed Imaging*, 230-233 (2011).
- 624 25 Bakeeva, L. E., Chentsov, Y. S. & Skulachev, V. P. Ontogenesis of mitochondrial  
625 reticulum in rat diaphragm muscle. *Eur J Cell Biol* **25**, 175-181 (1981).
- 626 26 Mishra, P., Varuzhanyan, G., Pham, A. H. & Chan, D. C. Mitochondrial Dynamics  
627 is a Distinguishing Feature of Skeletal Muscle Fiber Types and Regulates  
628 Organellar Compartmentalization. *Cell metabolism* **22**, 1033-1044,  
629 doi:10.1016/j.cmet.2015.09.027 (2015).
- 630 27 Kim, Y., Yang, D. S., Katti, P. & Glancy, B. Protein composition of the muscle  
631 mitochondrial reticulum during postnatal development. *J Physiol* **597**, 2707-2727,  
632 doi:10.1113/JP277579 (2019).
- 633 28 Burkholder, T. J., Fingado, B., Baron, S. & Lieber, R. L. Relationship between  
634 muscle fiber types and sizes and muscle architectural properties in the mouse  
635 hindlimb. *Journal of morphology* **221**, 177-190, doi:10.1002/jmor.1052210207  
636 (1994).
- 637 29 Beier, T. *et al.* Multicut brings automated neurite segmentation closer to human  
638 performance. *Nat Methods* **14**, 101-102, doi:10.1038/nmeth.4151 (2017).
- 639 30 Agbulut, O., Noirez, P., Beaumont, F. & Butler-Browne, G. Myosin heavy chain  
640 isoforms in postnatal muscle development of mice. *Biology of the Cell* **95**, 399-  
641 406 (2003).
- 642 31 Gokhin, D. S., Ward, S. R., Bremner, S. N. & Lieber, R. L. Quantitative analysis  
643 of neonatal skeletal muscle functional improvement in the mouse. *Journal of*  
644 *Experimental Biology* **211**, 837-843, doi:10.1242/jeb.014340 (2008).
- 645 32 Kirkwood, S. P., Munn, E. A. & Brooks, G. A. Mitochondrial reticulum in limb  
646 skeletal muscle. *Am J Physiol* **251**, C395-402 (1986).

- 647 33 Kirkwood, S. P., Packer, L. & Brooks, G. A. Effects of endurance training on a  
648 mitochondrial reticulum in limb skeletal muscle. *Arch Biochem Biophys* **255**, 80-  
649 88, doi:0003-9861(87)90296-7 [pii] (1987).
- 650 34 Liu, X. & Hajnoczky, G. Altered fusion dynamics underlie unique morphological  
651 changes in mitochondria during hypoxia-reoxygenation stress. *Cell death and*  
652 *differentiation* **18**, 1561-1572, doi:10.1038/cdd.2011.13 (2011).
- 653 35 Glancy, B. *et al.* Power Grid Protection of the Muscle Mitochondrial Reticulum.  
654 *Cell Rep* **19**, 487-496, doi:10.1016/j.celrep.2017.03.063 (2017).
- 655 36 Gatta, A. T. & Levine, T. P. Piecing Together the Patchwork of Contact Sites.  
656 *Trends Cell Biol* **27**, 214-229, doi:10.1016/j.tcb.2016.08.010 (2017).
- 657 37 Buresova, J. *et al.* Postnatal induction of muscle fatty acid oxidation in mice  
658 differing in propensity to obesity: a role of pyruvate dehydrogenase. *Int J Obes*  
659 *(Lond)* **44**, 235-244, doi:10.1038/s41366-018-0281-0 (2020).
- 660 38 Hargreaves, M. & Spriet, L. L. Skeletal muscle energy metabolism during  
661 exercise. *Nat Metab* **2**, 817-828, doi:10.1038/s42255-020-0251-4 (2020).
- 662 39 Luff, A. R. & Atwood, H. L. Changes in the sarcoplasmic reticulum and  
663 transverse tubular system of fast and slow skeletal muscles of the mouse during  
664 postnatal development. *J Cell Biol* **51**, 369-383 (1971).
- 665 40 Franzini-Armstrong, C. Simultaneous maturation of transverse tubules and  
666 sarcoplasmic reticulum during muscle differentiation in the mouse. *Dev Biol* **146**,  
667 353-363, doi:10.1016/0012-1606(91)90237-w (1991).
- 668 41 Eisenberg, B. R. Quantitative ultrastructure of mammalian skeletal muscle.  
669 *Comprehensive physiology*, 73-112 (2010).
- 670 42 Debattisti, V. *et al.* Dysregulation of mitochondrial Ca<sup>2+</sup> uptake and sarcolemma  
671 repair underlie muscle weakness and wasting in patients and mice lacking  
672 MICU1. *Cell reports* **29**, 1274-1286. e1276 (2019).
- 673 43 Tu, M. K., Levin, J. B., Hamilton, A. M. & Borodinsky, L. N. Calcium signaling in  
674 skeletal muscle development, maintenance and regeneration. *Cell calcium* **59**,  
675 91-97 (2016).
- 676 44 Stiber, J. *et al.* STIM1 signalling controls store-operated calcium entry required  
677 for development and contractile function in skeletal muscle. *Nature cell biology*  
678 **10**, 688-697 (2008).
- 679 45 Hahn, P. Development of lipid metabolism. *Annual review of nutrition* **2**, 91-111  
680 (1982).
- 681 46 Yao, Y., Ding, L. & Huang, X. Diverse Functions of Lipids and Lipid Metabolism  
682 in Development. *Small Methods* **4**, 1900564 (2020).
- 683 47 Veliova, M., Petcherski, A., Liesa, M. & Shirihai, O. S. The biology of lipid droplet-  
684 bound mitochondria. *Semin Cell Dev Biol* **108**, 55-64,  
685 doi:10.1016/j.semcdb.2020.04.013 (2020).
- 686 48 Friedman, J. R. *et al.* ER tubules mark sites of mitochondrial division. *Science*  
687 **334**, 358-362, doi:10.1126/science.1207385 (2011).
- 688 49 Phillips, M. J. & Voeltz, G. K. Structure and function of ER membrane contact  
689 sites with other organelles. *Nat Rev Mol Cell Biol* **17**, 69-82,  
690 doi:10.1038/nrm.2015.8 (2016).
- 691 50 Giacomello, M. & Pellegrini, L. The coming of age of the mitochondria-ER  
692 contact: a matter of thickness. *Cell Death & Differentiation* **23**, 1417-1427 (2016).

- 693 51 Naon, D. & Scorrano, L. At the right distance: ER-mitochondria juxtaposition in  
694 cell life and death. *Biochim Biophys Acta* **1843**, 2184-2194,  
695 doi:10.1016/j.bbamcr.2014.05.011 (2014).
- 696 52 Subramanian, K. *et al.* Coenzyme Q biosynthetic proteins assemble in a  
697 substrate-dependent manner into domains at ER–mitochondria contacts. *Journal*  
698 *of Cell Biology* **218**, 1353-1369 (2019).
- 699 53 Prudent, J. & McBride, H. M. The mitochondria–endoplasmic reticulum contact  
700 sites: a signalling platform for cell death. *Current opinion in cell biology* **47**, 52-63  
701 (2017).
- 702 54 Boncompagni, S., Pozzer, D., Viscomi, C., Ferreiro, A. & Zito, E. Physical and  
703 functional cross talk between endo-sarcoplasmic reticulum and mitochondria in  
704 skeletal muscle. *Antioxidants & redox signaling* **32**, 873-883 (2020).
- 705 55 Boncompagni, S. *et al.* Mitochondria are linked to calcium stores in striated  
706 muscle by developmentally regulated tethering structures. *Molecular biology of*  
707 *the cell* **20**, 1058-1067, doi:10.1091/mbc.E08-07-0783 (2009).
- 708 56 Schiaffino, S. & Margreth, A. Coordinated development of the sarcoplasmic  
709 reticulum and T system during postnatal differentiation of rat skeletal muscle. *J*  
710 *Cell Biol* **41**, 855-875 (1969).
- 711 57 Schwarz, D. S. & Blower, M. D. The endoplasmic reticulum: structure, function  
712 and response to cellular signaling. *Cellular and Molecular Life Sciences* **73**, 79-  
713 94 (2016).
- 714 58 Westrate, L., Lee, J., Prinz, W. & Voeltz, G. Form follows function: the  
715 importance of endoplasmic reticulum shape. *Annual review of biochemistry* **84**,  
716 791-811 (2015).
- 717 59 Deshmukh, A. S. *et al.* Deep proteomics of mouse skeletal muscle enables  
718 quantitation of protein isoforms, metabolic pathways, and transcription factors.  
719 *Molecular & Cellular Proteomics* **14**, 841-853 (2015).

720

721

722

723

724

725

726

727

728

729

730

731

732
